# Supplementary material for: Antioxidant mechanisms and products of four 4′,5,7-trihydroxyflavonoids with different structural types
Source: Royal Society of Chemistry journal article supplement (doi:10.1039/d2md00333c), 2022-11-03
Supplement: d2md00333c1.pdf [file d2md00333c1.pdf]

**Supplementary Information (ESI)**

**Antioxidant mechanisms and products of four 4',5,7-  
trihydroxyflavonoids with different structural types**

Ban Chen,<sup>a,b</sup> Jiangtao Su<sup>a,b</sup>, Yuchen Hu<sup>a,b</sup>, Shuqin Liu<sup>c</sup>, Xiaojian Ouyang<sup>d</sup>, Rongxin Cai<sup>e</sup>  
and Xican Li<sup>\*c</sup>

- a. Key Laboratory of Fermentation Engineering (Ministry of Education), Hubei University of Technology, Wuhan, 430000, China
  - b. Cooperative Innovation Center of Industrial Fermentation (Ministry of Education & Hubei Province), Hubei University of Technology, Wuhan, 430000, China
  - c. School of Chinese Herbal Medicine; Guangzhou University of Chinese Medicine, Guangzhou, 510000, China
  - d. IncreasePharm Hengqin Inst. Co., Ltd., Zhuhai, 519000, China
  - e. Guangdong Food Industry Institute Co., Ltd., Guangzhou, 510000, China.
- \* Corresponding Author: [lixican@126.com](mailto:lixican@126.com); [lixc@gzucm.edu.cn](mailto:lixc@gzucm.edu.cn)

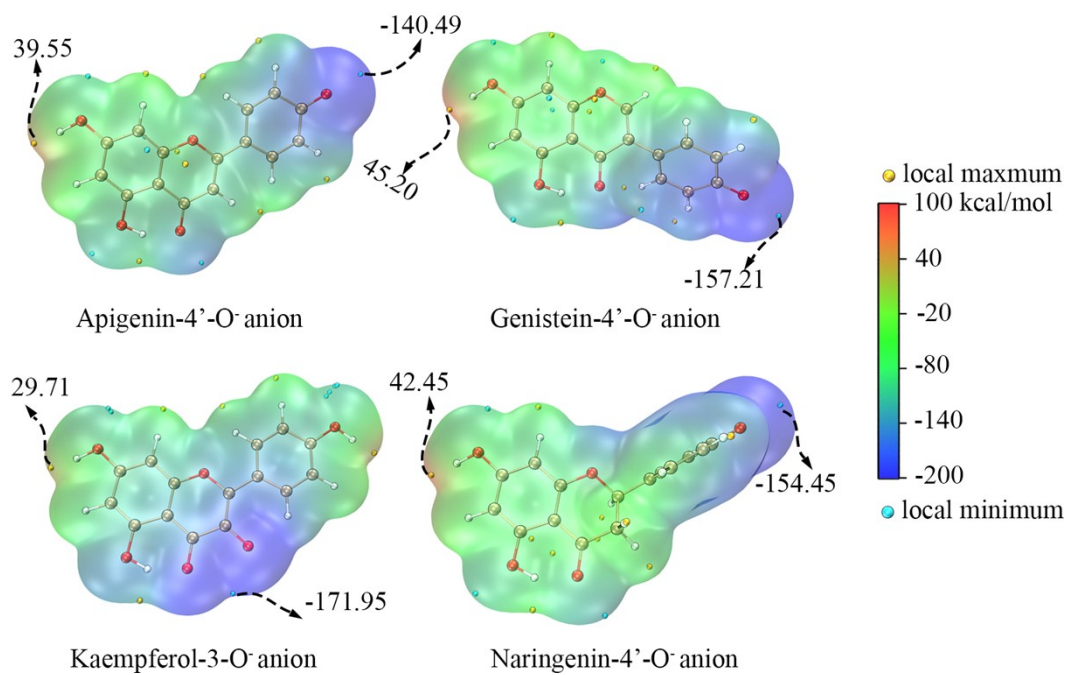

Fig. S1 The electrostatic potential of the four flavonoid anions.

Table S1 The atomic charges and bond dipole moments (Debye) of hydroxyls of the four flavonoids

| Molecule | Site of the hydroxyl | Charge of the O atom | Charge of the H atom | Charge of the hydroxyl | bond moment of the O-H |
|----------|----------------------|----------------------|----------------------|------------------------|------------------------|
| AP       | C <sub>5</sub>       | -0.414               | 0.280                | -0.134                 | 0.83087                |
|          | C <sub>7</sub>       | -0.408               | 0.317                | -0.091                 | 0.66642                |
|          | C <sub>4'</sub>      | -0.413               | 0.315                | -0.098                 | 0.66393                |
| GE       | C <sub>5</sub>       | -0.410               | 0.282                | -0.128                 | 0.82867                |
|          | C <sub>7</sub>       | -0.407               | 0.318                | -0.089                 | 0.66790                |
|          | C <sub>4'</sub>      | -0.429               | 0.310                | -0.119                 | 0.65531                |
| KA       | C <sub>3</sub>       | -0.413               | 0.293                | -0.120                 | 0.72244                |
|          | C <sub>5</sub>       | -0.408               | 0.284                | -0.124                 | 0.79888                |
|          | C <sub>7</sub>       | -0.407               | 0.318                | -0.089                 | 0.66698                |
| NA       | C <sub>4'</sub>      | -0.417               | 0.313                | -0.104                 | 0.66174                |
|          | C <sub>5</sub>       | -0.405               | 0.282                | -0.123                 | 0.81699                |
|          | C <sub>7</sub>       | -0.403               | 0.318                | -0.085                 | 0.66712                |
|          | C <sub>4'</sub>      | -0.429               | 0.310                | -0.119                 | 0.65572                |

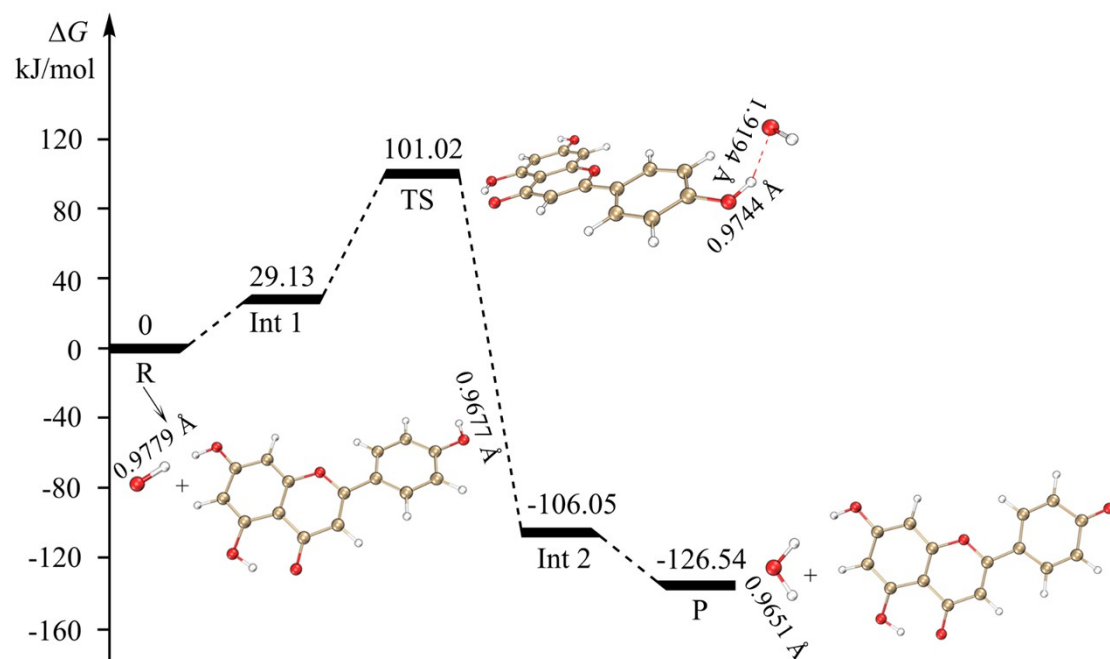

Fig. S2 The intrinsic reaction coordinates of apigenin to scavenging  $\cdot\text{OH}$  (R: reactants; Int: intermediates; TS: transition state; P: products).

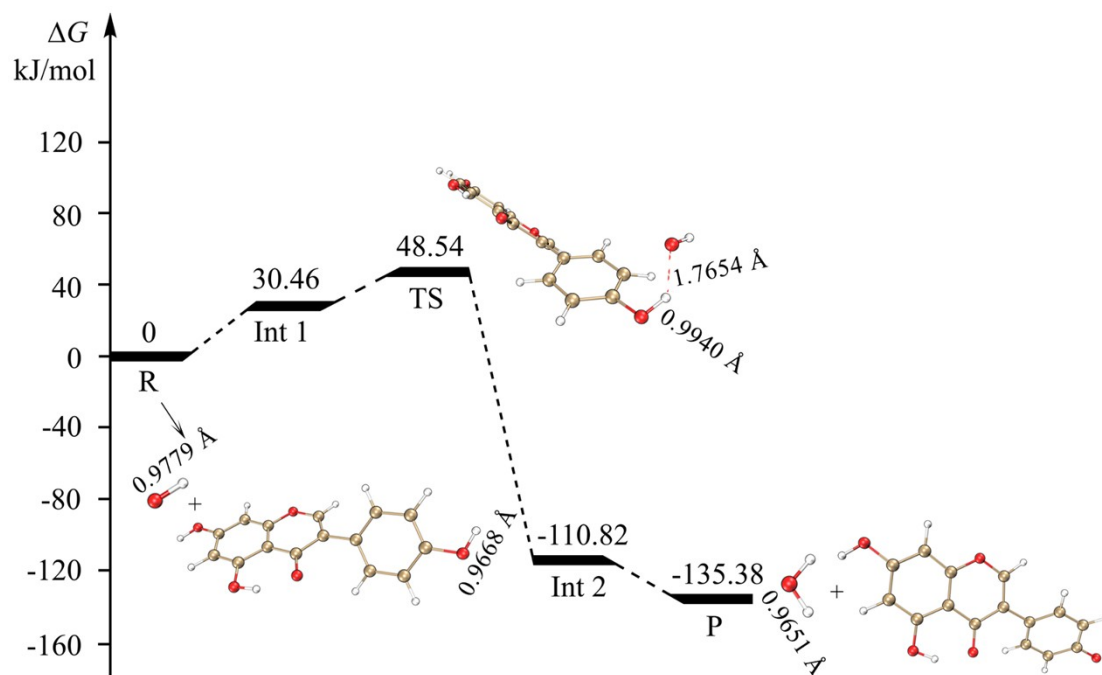

Fig. S3 The intrinsic reaction coordinates of genistein to scavenging  $\cdot\text{OH}$  (R: reactants; Int: intermediates; TS: transition state; P: products).

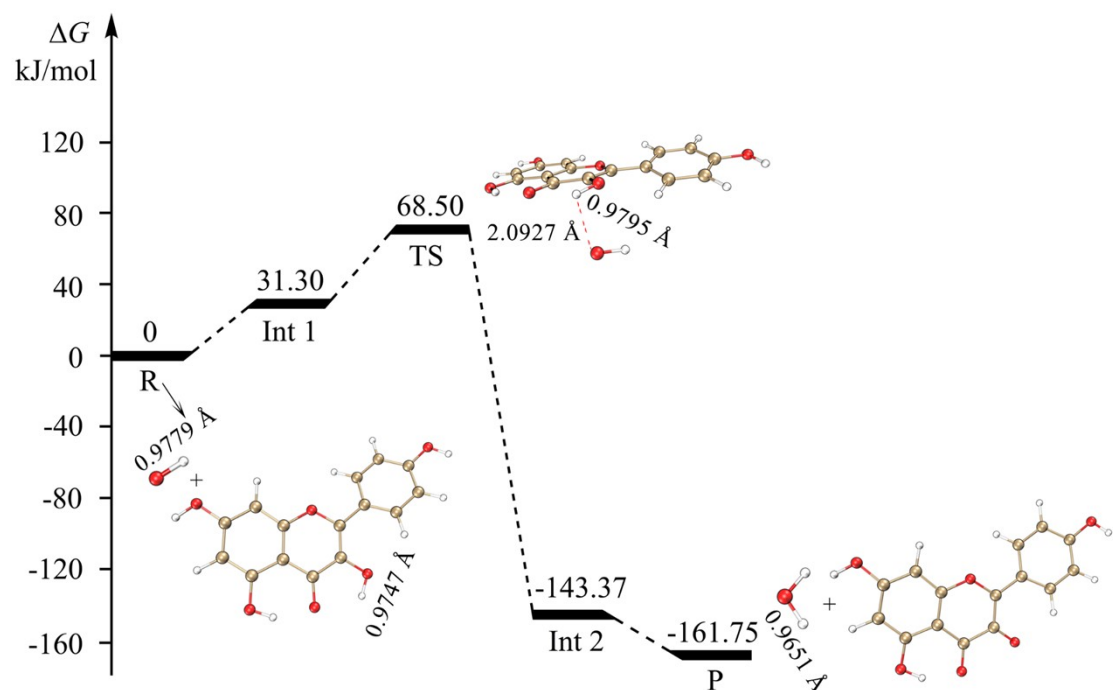

Fig. S4 The intrinsic reaction coordinates of kaempferol to scavenging  $\cdot\text{OH}$  (R: reactants; Int: intermediates; TS: transition state; P: products).

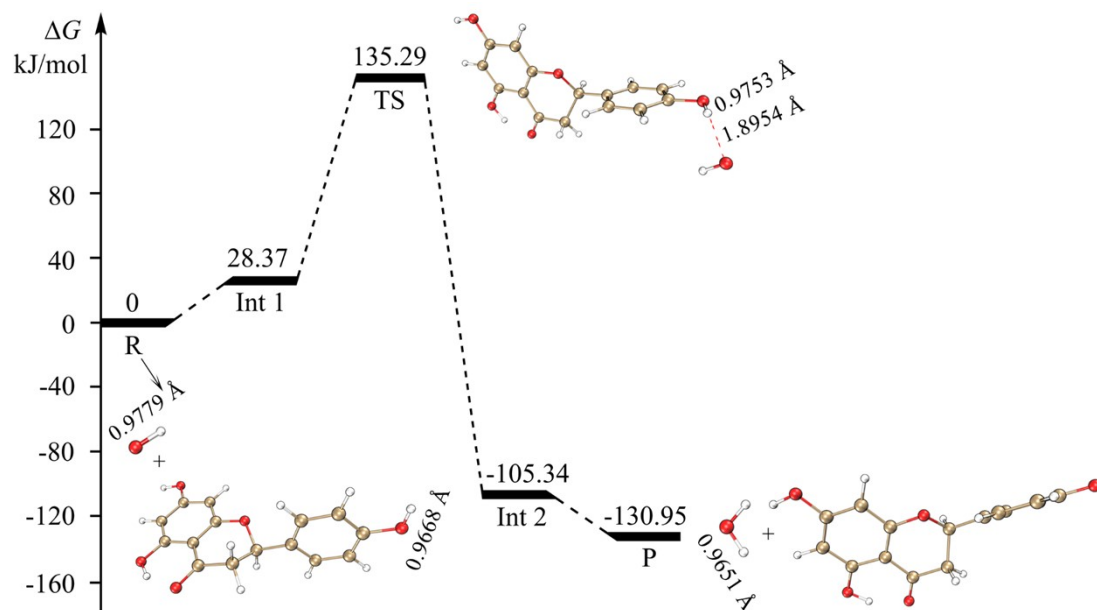

Fig. S5 The intrinsic reaction coordinates of naringenin to scavenging  $\cdot\text{OH}$  (R: reactants; Int: intermediates; TS: transition state; P: products).

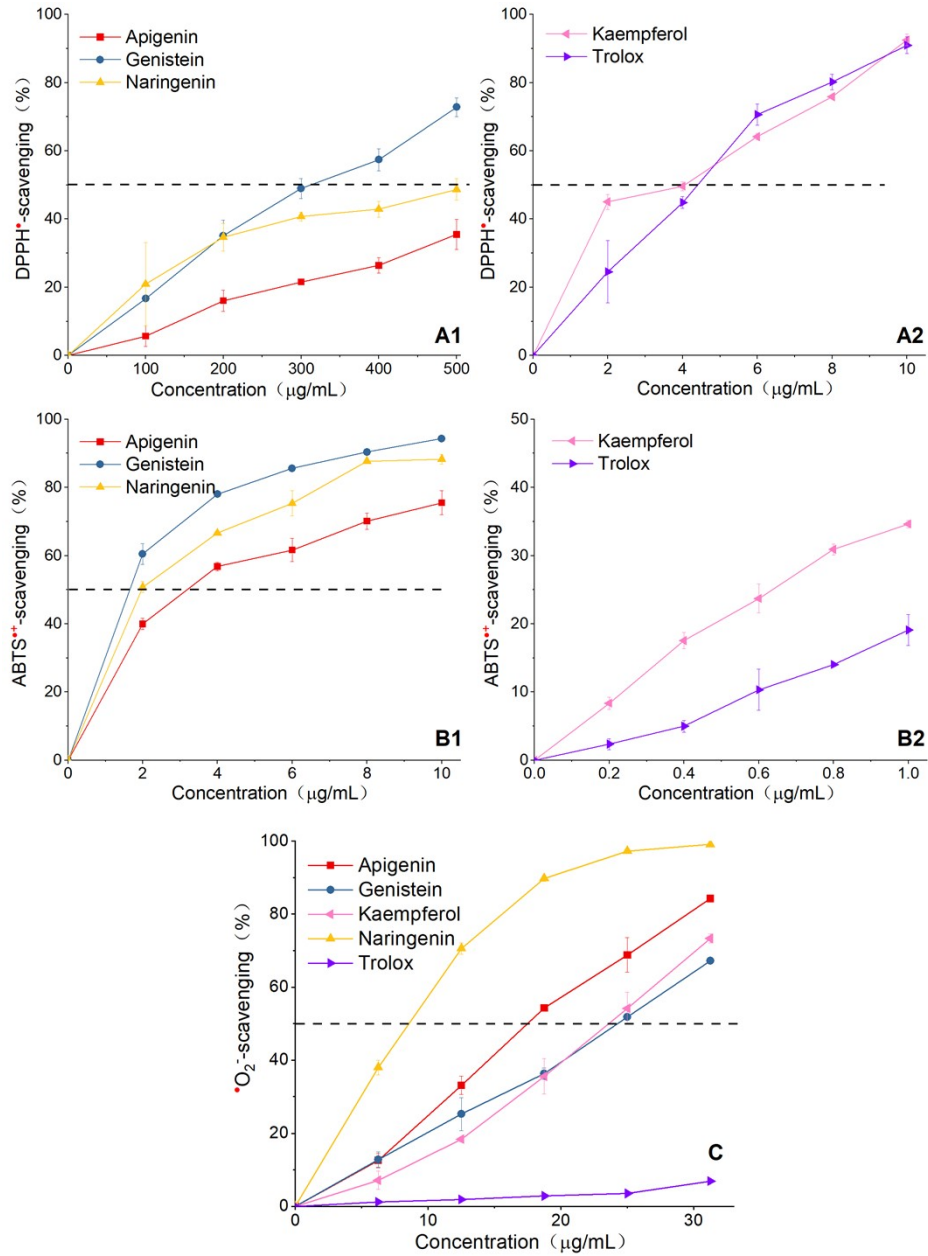

Fig. S6 The dose-response curves of the four flavonoids in DPPH<sup>•</sup>-scavenging (A), ABTS<sup>•+</sup>-scavenging (B), and •O<sub>2</sub><sup>-</sup>-scavenging (C) assays.
